# Supplementary material for: Calcination of a layered aluminofluorophosphate precursor to form the zeolitic AFO framework
Source: Royal Society of Chemistry journal article supplement (doi:10.1039/b518265d), 2006-01-01
Supplement: b518265d.pdf [file b518265d.pdf]

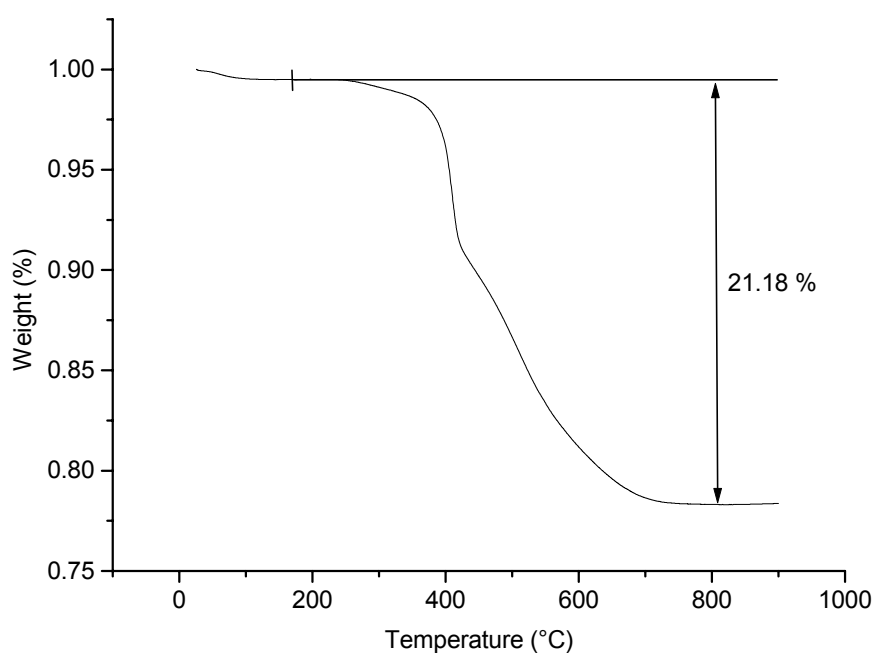

Fig S1. Thermogravimetric analysis of 'as-made' [F, Tet-A]-AlPO-1.  
Heating rate of  $10^{\circ}\text{C min}^{-1}$  in flowing oxygen.
